# Supplementary material for: Water molecule induced reversible single-crystal-to-single-crystal transformation between two trinuclear Fe(ii) complexes with different spin crossover behaviour
Source: Royal Society of Chemistry journal article supplement (doi:10.1039/c8dt00318a), 2018-01-01
Supplement: c8dt00318a1.pdf [file c8dt00318a1.pdf]

## Water Molecule Induced Reversible Single-Crystal-to-Single-Crystal Transformation Between Two Trinuclear Fe(II) Complexes with Different Spin Crossover Behavior

Wen-Bin Chen,<sup>a</sup> Yan-Cong Chen,<sup>b</sup> Meng Yang,<sup>a</sup> Ming-Liang Tong<sup>\*b</sup> and Wen Dong<sup>\*a</sup>

a. Guangzhou Key Laboratory for Environmentally Functional Materials and Technology, School of Chemistry and Chemical Engineering, Guangzhou University, Guangzhou 510006, P. R. China.

b. School of Chemistry, Sun Yat-Sen University, Guangzhou 510275, P. R. China.

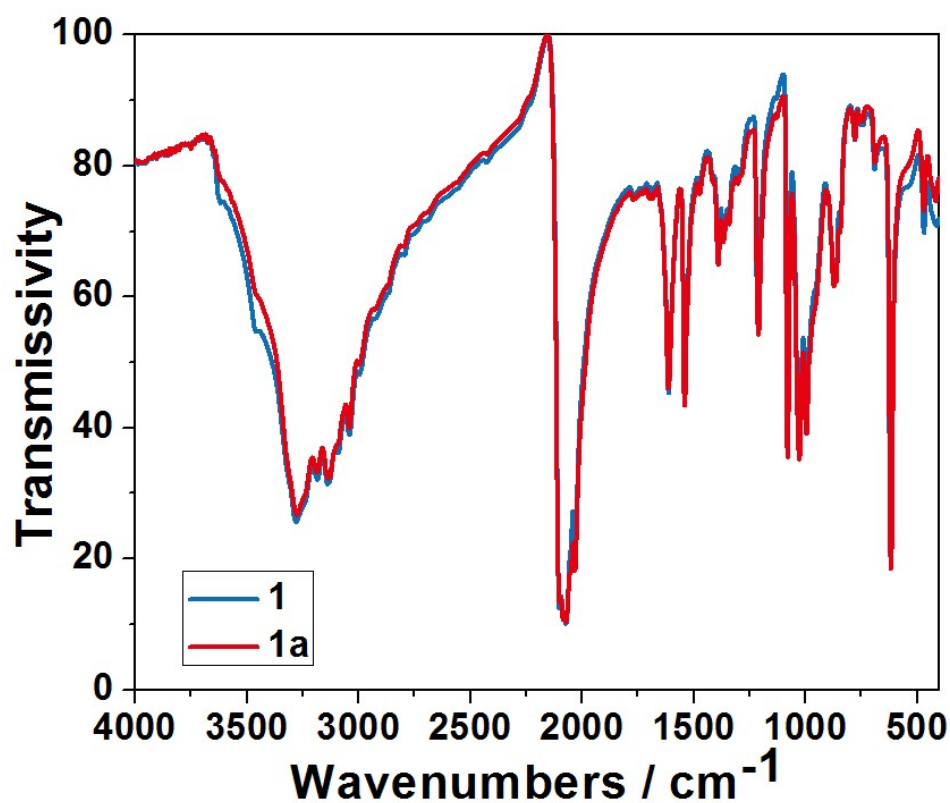

Fig. S1 IR of complex 1 and 1a.

**Table S1.** Selected bond distances for Fe3 in complex **1** and **1a** at different temperatures.

|                 | <b>1</b> |          |          | <b>1a</b>       |          |           |           |
|-----------------|----------|----------|----------|-----------------|----------|-----------|-----------|
|                 | 100 K    | 150 K    | 293 K    | 100 K           | 150K     | 293K      |           |
| Fe(3)-N(14)     | 2.155(3) | 2.178(4) | 2.178(7) | Fe(3)-N(14)     | 2.162(5) | 2.162(9)  | 2.168(6)  |
| Fe(3)-N(18)     | 2.185(3) | 2.184(4) | 2.197(6) | Fe(3)-N(18)     | 2.195(6) | 2.210(11) | 2.217(8)  |
| Fe(3)-N(22)     | 2.143(3) | 2.146(4) | 2.210(6) | Fe(3)-N(22)     | 2.174(7) | 2.138(12) | 2.165(8)  |
| Fe(3)-N(27)     | 2.086(3) | 2.090(4) | 2.112(6) | Fe(3)-N(27)     | 2.122(7) | 2.139(10) | 2.137(8)  |
| Fe(3)-N(28)     | 2.142(3) | 2.133(4) | 2.129(8) | Fe(3)-N(28)     | 2.114(7) | 2.111(13) | 2.119(10) |
| Fe(3)-O(2)      | 2.184(3) | 2.176(3) | 2.196(6) | Fe(3)-N(29)     | 2.149(7) | 2.149(13) | 2.175(9)  |
| Average Fe(3)-N | 2.142    | 2.146    | 2.165    | Average Fe(3)-N | 2.152    | 2.152     | 2.164     |

**Table S2.** Information of hydrogen bonds in complex **1** at 100K obtained by PLATON tables.

| Hydrogen Bond   | Bond Distances (Å) | Bond Angles (°) | Symmetry of the acceptor |
|-----------------|--------------------|-----------------|--------------------------|
| O2--H2A...N29   | 2.8564(1)          | 166             | x-1/2,-y+1/2,-z          |
| O1--H1A...N12   | 2.9023(1)          | 147             | -x+1,y+1/2,-z+1/2        |
| N20--H20A...N30 | 2.9220(1)          | 146             | x,y-1,z                  |
| N4--H4B...N29   | 2.9684(1)          | 164             |                          |
| C7--H7...O3     | 3.0970(1)          | 168             | -x+1,y-1/2,-z+1/2        |
| C10--H10...N16  | 3.1532(1)          | 135             | x+1/2,-y+1/2,-z          |
| N16--H16A...N29 | 3.2103(1)          | 136             |                          |
| O1--H1B...S2    | 3.2780(1)          | 156             | -x+1,y-1/2,-z+1/2        |
| O2--H2B...S3    | 3.2785(1)          | 164             | x-1/2,-y+1/2,-z          |
| N24--H24A...S6  | 3.3099(1)          | 117             | x+1/2,-y+1/2,-z          |
| N24--H24A...N16 | 3.3144(1)          | 136             | x+1/2,-y+1/2,-z          |
| N8--H8B...S1    | 3.3308(1)          | 141             | -x,y+1/2,-z+1/2          |
| O3--H3B...S5    | 3.3336(1)          | 165             | x+1,y,z                  |
| N20--H20B...S4  | 3.3367(1)          | 146             | x-1/2,-y-1/2,-z          |
| N16--H16B...S1  | 3.3523(1)          | 147             | -x,y+1/2,-z+1/2          |
| N12--H12A...S4  | 3.3659(1)          | 140             | x+1/2,-y-1/2,-z          |
| N4--H4A...S1    | 3.3744(1)          | 141             | -x+1,y+1/2,-z+1/2        |
| N24--H24B...S3  | 3.3993(1)          | 127             | x+1/2,-y+1/2,-z          |
| N8--H8A...S5    | 3.4621(1)          | 136             | -x,y-1/2,-z+1/2          |
| C5--H5...S6     | 3.6077(1)          | 173             | x,y-1,z                  |

**Table S3.** Information of hydrogen bonds in complex **1a** at 100K obtained by PLATON tables.

| Hydrogen Bond   | Bond Distances (Å) | Bond Angles (°) | Symmetry of the acceptor |
|-----------------|--------------------|-----------------|--------------------------|
| N20--H20A...N30 | 2.8358(12)         | 144             | x,y-1,z                  |
| O1--H1B...N12   | 2.8833(13)         | 156             | -x+1,y+1/2,-z+1/2        |
| C10--H10...N16  | 3.0934(14)         | 132             | x+1/2,-y+1/2,-z          |
| N12--H12B...N4  | 3.1223(14)         | 135             | x,y-1,z                  |
| O1--H1A...S2    | 3.2274(14)         | 157             | -x+1,y-1/2,-z+1/2        |
| N20--H20B...S4  | 3.2425(14)         | 136             | x-1/2,-y-1/2,-z          |
| N16--H16B...S1  | 3.3072(14)         | 147             | -x,y+1/2,-z+1/2          |
| N24--H24A...S3  | 3.3152(15)         | 136             | x+1/2,-y+1/2,-z          |
| N4--H4A...S1    | 3.3181(15)         | 127             | -x+1,y+1/2,-z+1/2        |
| C4--H4...N30    | 3.3651(15)         | 140             | -x,y-1/2,-z+1/2          |
| N16--H16A...S5  | 3.3718(15)         | 143             | x+1/2,-y+1/2,-z          |
| N4--H4B...S5    | 3.3866(15)         | 150             | x+1/2,-y+1/2,-z          |
| N12--H12B...S4  | 3.3925(15)         | 136             | x+1/2,-y-1/2,-z          |
| N12--H12A...S6  | 3.6041(16)         | 162             | x,y-1,z                  |
| C11--H11...S6   | 3.6593(16)         | 175             |                          |

**Table S4.** Information of hydrogen bonds in complex **2** obtained by PLATON tables.<sup>1</sup>

| Hydrogen Bond   | Bond Distances (Å) | Bond Angles (°) | Symmetry of the acceptor |
|-----------------|--------------------|-----------------|--------------------------|
| O1--H1A...S2    | 3.221(4)           | 146             | $1/2+x, 1/2-y, -1/2+z$   |
| O1--H1B...N30   | 2.731(8)           | 169             | $2-x, 1-y, 1-z$          |
| O2--H2B...N6    | 3.174(6)           | 180             |                          |
| O3--H3A...N13   | 3.030(18)          | 145             | $-1+x, y, z$             |
| O3--H3A...N14   | 3.007(19)          | 178             | $-1+x, y, z$             |
| O3--H3A...N15   | 3.176(17)          | 128             | $-1+x, y, z$             |
| N4--H4A...S1    | 3.414(5)           | 142             | $1-x, -y, 2-z$           |
| N4--H4B...S6    | 3.681(5)           | 155             | $x, -1+y, z$             |
| O4--H4C...N16   | 2.948(7)           | 178             | $1-x, -y, 1-z$           |
| N8--H8A...S3    | 3.331(4)           | 152             | $1+x, y, z$              |
| N12--H12A...O4  | 3.069(8)           | 174             | $1/2+x, 1/2-y, 1/2+z$    |
| N12--H12B...S4  | 3.599(5)           | 150             | $-1/2+x, 1/2-y, 1/2+z$   |
| N16--H16A...S1  | 3.251(4)           | 111             | $2-x, -y, 2-z$           |
| N16--H16A...S5  | 3.490(4)           | 130             | $2-x, -y, 1-z$           |
| N16--H16B...N30 | 2.904(8)           | 124             | $x, -1+y, z$             |
| N20--H20B...S4  | 3.381(5)           | 142             | $1/2+x, 1/2-y, 1/2+z$    |
| N24--H24A...N29 | 3.146(6)           | 168             | $1-x, -y, 1-z$           |
| N24--H24B...S6  | 3.368(4)           | 131             | $1-x, 1-y, 1-z$          |
| C1--H1...N24    | 3.446(6)           | 169             | $1-x, -y, 1-z$           |
| C3--H3...O3     | 3.05(2)            | 152             | $1+x, y, z$              |
| C4--H4...N12    | 3.265(6)           | 151             | $1/2+x, 1/2-y, 1/2+z$    |
| C5--H5...N8     | 3.527(6)           | 171             | $-1/2+x, 1/2-y, -1/2+z$  |
| C7--H7...O2     | 3.272(7)           | 171             |                          |
| C9--H9...S6     | 3.523(5)           | 169             | $3/2-x, -1/2+y, 3/2-z$   |
| C10--H10...N26  | 3.279(6)           | 147             | $1/2+x, 1/2-y, -1/2+z$   |
| C11--H11...S5   | 3.644(5)           | 158             | $1-x, -y, 1-z$           |
| C12--H12...N4   | 3.414(7)           | 164             | $1-x, -y, 1-z$           |

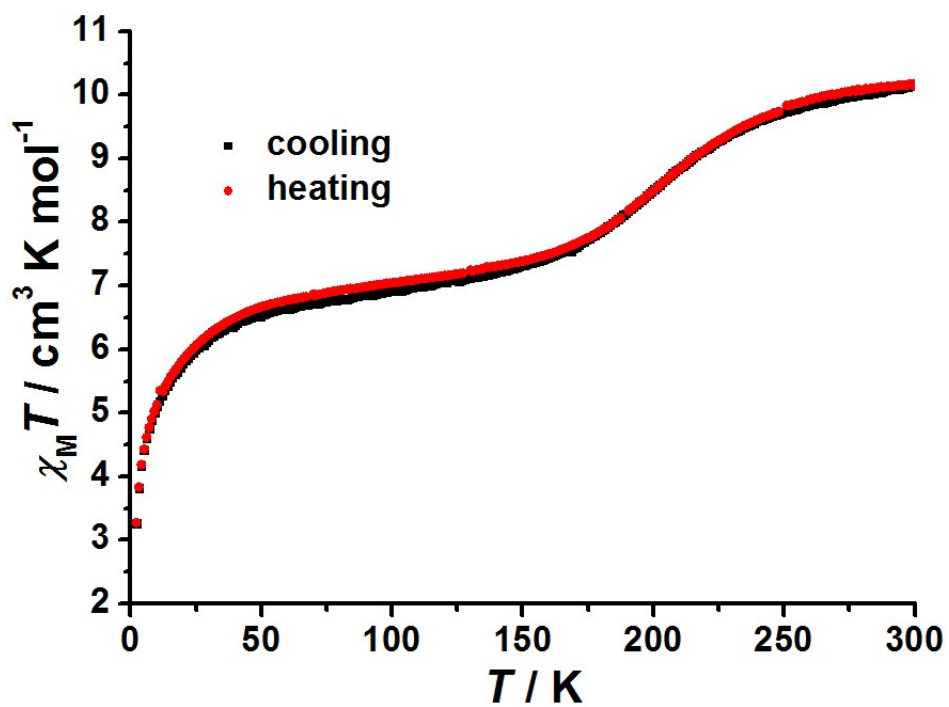

**Fig. S2.** Plots of  $\chi_M T$  vs.  $T$  for **1**. The black shows the cooling progress and the red line indicates the heating progress.

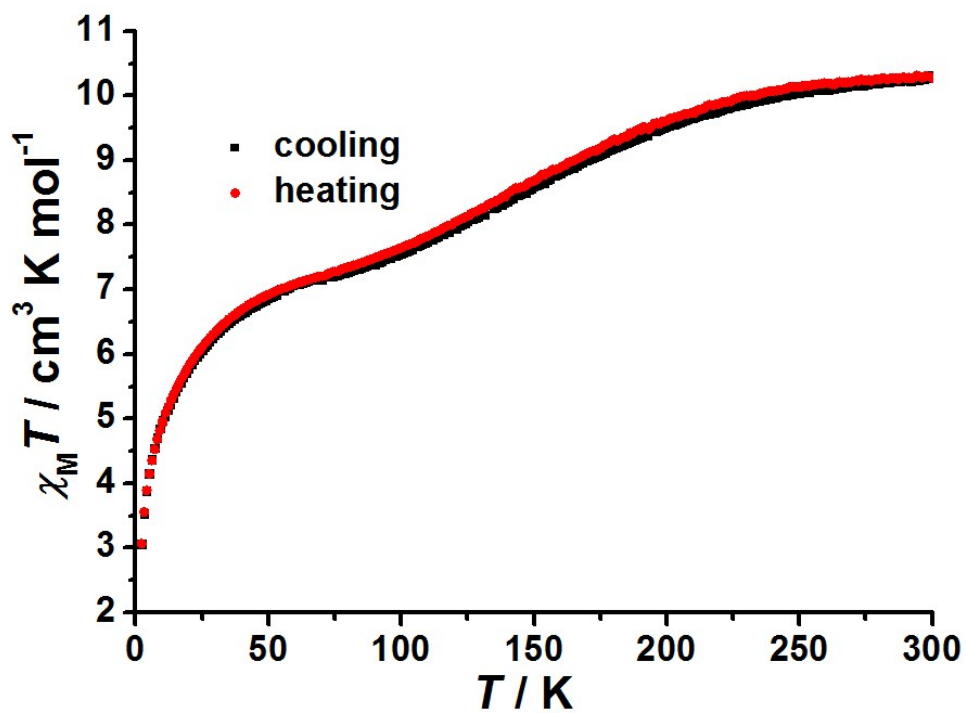

**Fig. S3.** Plots of  $\chi_M T$  vs.  $T$  for **1a**. The black shows the cooling progress and the red line indicates the heating progress.

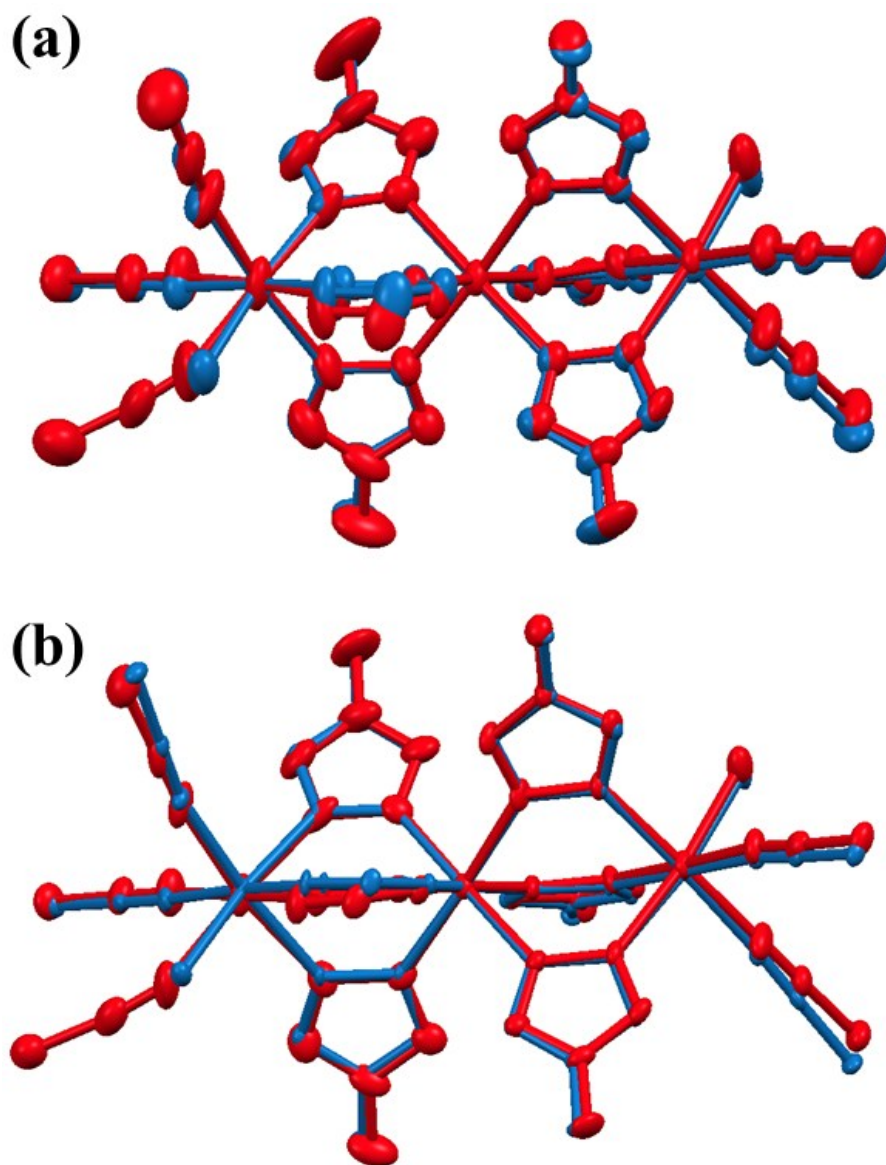

**Fig. S4** Superposition of the two core structures of **1** (blue) and **1a** (red) between the HS (a) and LS (b) states.

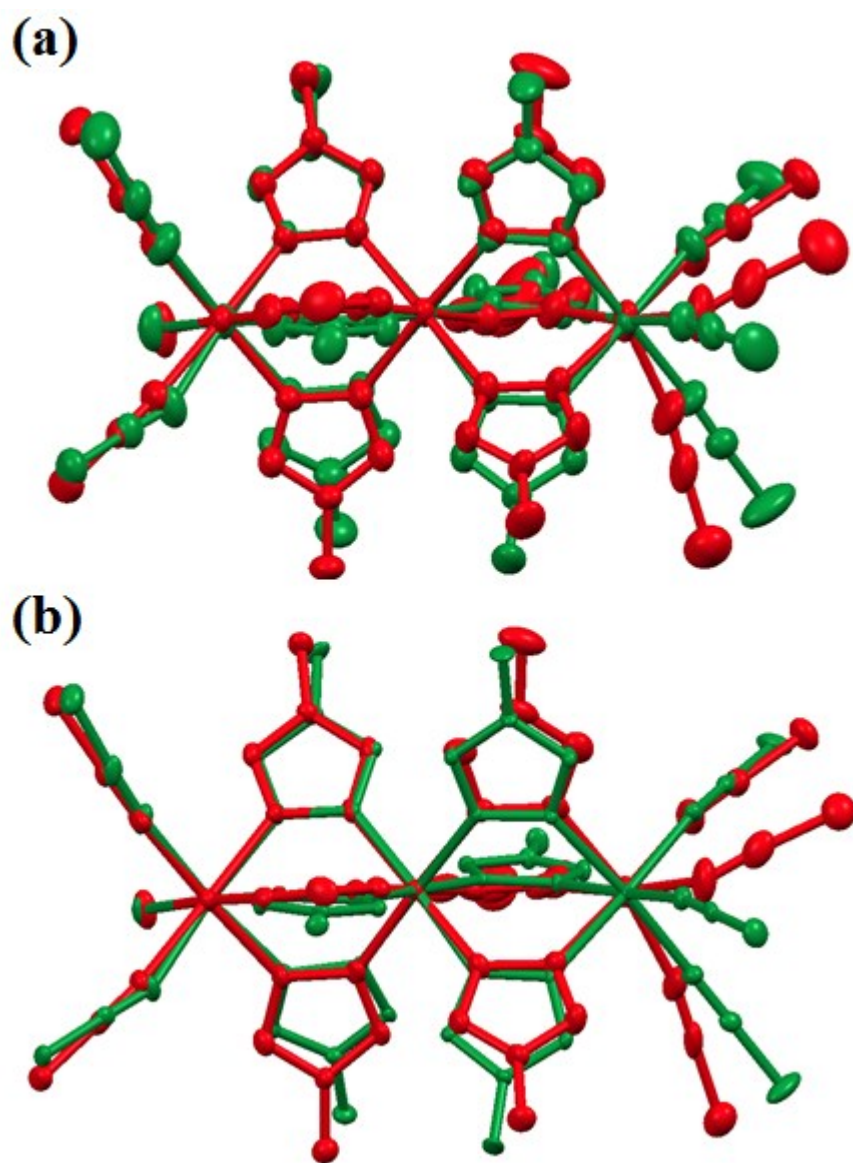

**Fig. S5** Superposition of the two core structures of **1a** (red) and **2** (green) between the HS (a) and LS (b) states.

2

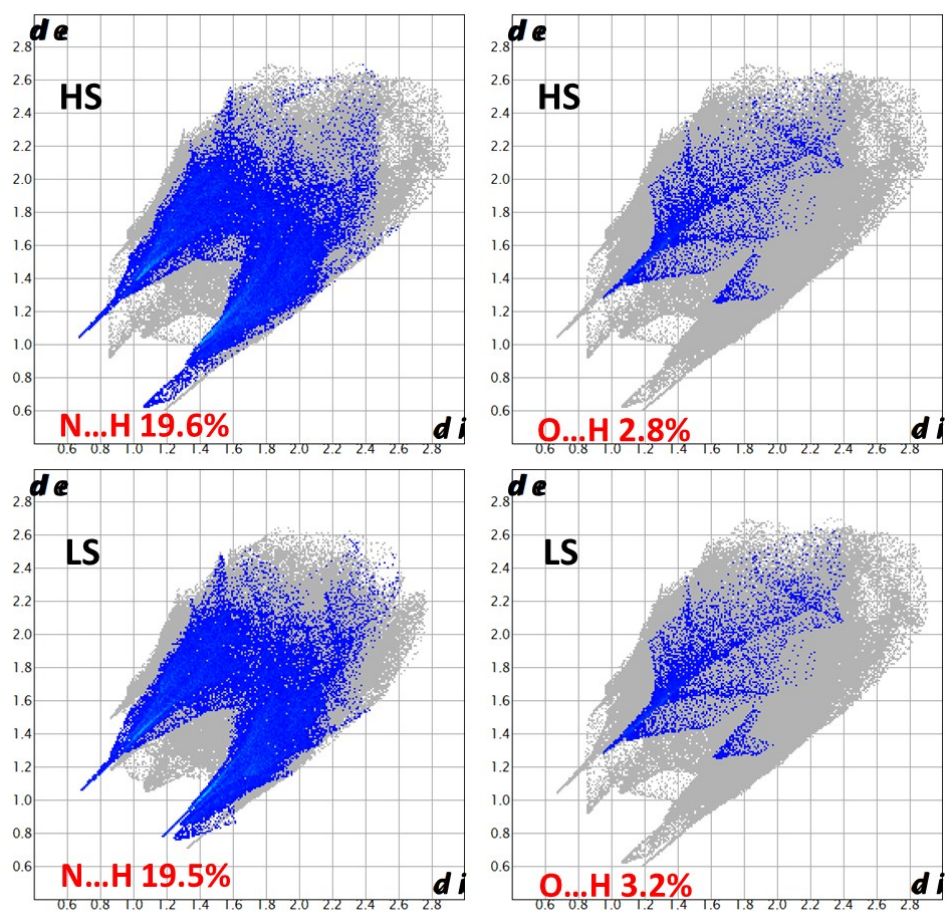

**Fig. S6** Fingerprints of the intermolecular interactions in **2** within the HS (up) and LS (down) crystal packings from Single-Crystal X-ray Diffraction data. Grey zones represent all of the interactions and the blue zones account for the corresponding selected interaction, i.e. N...H (left) and O...H (right).



## References

- 1 W.-B. Chen, J.-D. Leng, Z.-Z. Wang, Y.-C. Chen, Y. Miao, M.-L. Tong and W. Dong, *Chem. Commun.*, 2017, **53**, 7820-7823.
